**Correction** . *The Journal of Experimental Medicine*

---

Guidotti et al. Vol. 189, No. 10, May 17, 1999. Pages 1555–1564.

The authors regret that they failed to acknowledge the support of National Institutes of Health grant AI09484 (to P. Borrow).

---
